# Supplementary material
Source: PubMed Central journal article supplement (PMC5155202)
Supplement: jcsm.12.12.1623s1.pdf [file jcsm.12.12.1623s1.pdf]

| Pt. # | Sex | Age (y) | Diagnostic proof                          | Disease duration (y) | ERT status T0 | Symptoms of SDB | Upright FVC (% predicted) | $\Delta$ FVC (%) | AHI (/h)    | daytime pCO <sub>2</sub> (mmHg) | $\Delta$ tcCO <sub>2</sub> (mmHg) | tcCO <sub>2</sub> max (mmHg) | Diagnosis   | NIV |
|-------|-----|---------|-------------------------------------------|----------------------|---------------|-----------------|---------------------------|------------------|-------------|---------------------------------|-----------------------------------|------------------------------|-------------|-----|
| 1     | M   | 39      | c.-32-13 T>G;<br>c.525delT                | 5                    | -             | -               | 105.0                     | 15.5             | 10.2        | 36.3                            | 3.4                               | 44.6                         | OSA         | -   |
| 2     | M   | 39      | c.-32-13 T>G;<br>c.525delT                | 9                    | stopped       | +               | <b>68.8</b>               | 45.5             | <b>7.8</b>  | 43.1                            | 5.4                               | 46.3                         | OSA,<br>RMW | +   |
| 3     | F   | 53      | Muscle biopsy;<br>EA <sup>§</sup>         | 28                   | +             | +               | <b>54.9</b>               | 43.8             | 1.6         | 41.0                            | <b>11.4</b>                       | 48.9                         | NH          | +   |
| 4     | F   | 45      | c.-32-13 T>G;<br>del Exon 18              | 17                   | +             | -               | 86.8                      | 7.1              | 1.9         | 34.2                            | 7.6                               | 44.5                         | -           | -   |
| 5     | F   | 61      | c.-32-13 T>G;<br>c.307T>G                 | 25                   | +             | +               | <b>67.3</b>               | 46.2             | 0.1         | 42.1                            | 6.8                               | 48.0                         | RMW         | +   |
| 6     | M   | 18      | c.-32-13 T>G;<br>c.1128_1129de<br>lGGinsC | 4                    | -             | -               | 81.5                      | 0                | 3.6         | 43.1                            | 3.0                               | 43.6                         | -           | -   |
| 7     | M   | 55      | c.-32-13 T>G;<br>c.701C>A                 | 16                   | +             | +               | <b>43.4</b>               | <b>42.1</b>      | 4.3         | 40.8                            | <b>14.3</b>                       | <b>56.4</b>                  | NH          | +   |
| 8     | F   | 45      | c.-32-13 T>G;<br>c.307T>G                 | 33                   | stopped       | +               | <b>57.7</b>               | 19.4             | 1.6         | 36.2                            | 2.3                               | 47.2                         | RMW         | +   |
| 9     | F   | 42      | c.-32-13 T>G;<br>c.307T>G                 | 27                   | +             | +               | <b>48.2</b>               | 47.1             | <b>11.9</b> | 39.8                            | 5.8                               | 46.8                         | OSA,<br>RMW | +   |
| 10    | M   | 75      | c.-32-13 T>G;<br>c.1548G>A                | 50                   | +             | -               | 39.0                      | 60.0             | 3.2         | 34.1                            | 5.5                               | 42.6                         | -           | -   |

|    |   |    |                                                                   |    |         |   |             |      |            |             |             |             |            |   |
|----|---|----|-------------------------------------------------------------------|----|---------|---|-------------|------|------------|-------------|-------------|-------------|------------|---|
| 11 | M | 54 | c.-32-13 T>G;<br>c.525delT                                        | 19 | +       | + | 71.6        | 51.7 | 8.5        | 41.1        | 1.0         | <b>55.0</b> | NH         | + |
| 12 | F | 71 | c.-32-13 T>G;<br>c.1927G>A                                        | 16 | +       | + | 62.6        | 29.4 | <b>6.3</b> | 36.5        | 13.7        | <b>50.8</b> | OSA,<br>NH | + |
| 13 | M | 54 | c.-32-13 T>G;<br>c.378delTG                                       | 6  | -       | - | 85.7        | 17.8 | 0.5        | 41.0        | 4.4         | 43.1        | -          | - |
| 14 | F | 28 | c.-32-13 T>G:<br>c.2322_2323in<br>sGGTGAGTC<br>TGCAAACG<br>GGGAGT | 11 | +       | - | 92.8        | 12.5 | 0.0        | 36.9        | 7.7         | 45.8        | -          | - |
| 15 | F | 58 | c.-32-13 T>G;<br>c.2481+102_2<br>646+31del                        | 7  | +       | + | <b>44.1</b> | 53.8 | 0.0        | 40.8        | 3.3         | 45.9        | RMW        | + |
| 16 | F | 46 | c.-32-13 T>G;<br>c.525delT                                        | 16 | stopped | + | <b>66.1</b> | 31.8 | 13.4       | 38.4        | 14.4        | <b>52.4</b> | OSA,<br>NH | + |
| 17 | F | 63 | c.-32-13 T>G;<br>c.2481+102_2<br>646+31del                        | 23 | +       | + | 81.6        | 56.5 | 0.0        | 39.5        | <b>10.2</b> | 46.8        | NH         | + |
| 18 | F | 42 | c.-32-13 T>G;<br>c.2481+102_2<br>646+31del                        | 9  | +       | - | 85.4        | 14.3 | 0.3        | 34.4        | 3.5         | 41.5        | -          | - |
| 19 | F | 49 | c.-32-13 T>G;<br>c.1196A>T                                        | 14 | -       | + | <b>64.1</b> | 66.7 | 6.5        | <b>53.2</b> | <b>37.8</b> | <b>85.7</b> | OSA<br>DH  | + |

|    |   |    |                                            |    |   |   |             |      |      |             |      |             |            |   |
|----|---|----|--------------------------------------------|----|---|---|-------------|------|------|-------------|------|-------------|------------|---|
| 20 | M | 71 | c.-32-13 T>G;<br>c.2481+102_2<br>646+31del | 26 | - | + | <b>25.8</b> | 49.5 | 12.6 | <b>48.8</b> | 6.9  | <b>54.3</b> | OSA<br>DH  | + |
| 21 | M | 62 | c.-32-13 T>G;<br>c.525delT                 | 4  | + | + | <b>65.2</b> | 35.7 | 4.1  | 39.0        | 3.2  | 44.5        | RMW        | + |
| 22 | M | 78 | c.-32-13 T>G;<br>c.525delT                 | 15 | - | + | <b>49.5</b> | 25.0 | 33.1 | 44.0        | 19.1 | <b>63.6</b> | OSA,<br>NH | + |

*Table S1. Clinical data, specific GAA gene mutations, and respiratory parameters in all 22 patients with LOPD at initial evaluation (T0). The fourth column depicts the GAA genotype if available. Values relevant for the diagnosis of SDB or the clinical decision to initiate NIV are printed in bold. M, male, F, female, GAA, glucosidase alpha, EA, GAA enzyme activity, FVC, forced vital capacity,  $\Delta$ FVC, positional drop of FVC, AHI, apnea hypopnea index, pCO<sub>2</sub>, carbon dioxide tension on morning blood gas analysis, tcCO<sub>2</sub>, transcutaneous carbon dioxide tension, NH, nocturnal hypoventilation, OSA, obstructive sleep apnea, RMW, respiratory muscle weakness (FVC<70% predicted), NIV, non-invasive ventilation, \*, patient lost to follow-up, #, patient declined NIV prior to T2. §, GAA enzyme activity in this particular patient was 0,55 [mmol/h/mg Protein] at pH 4.5.*

| #  | Follow-up duration (months) | ERT duration prior to T0 (months) | Start or restart of ERT after T0 | Upright FVC% at T0 | Upright FVC% at last follow up | 6-MWT distance at T0 (m) | 6-MWT distance at last follow-up | Rate of FVC change (% per month) | Rate of 6-MWT distance change per month (m) | Adherence to NIV at last follow-up | Duration of NIV per 24 h at last follow-up |
|----|-----------------------------|-----------------------------------|----------------------------------|--------------------|--------------------------------|--------------------------|----------------------------------|----------------------------------|---------------------------------------------|------------------------------------|--------------------------------------------|
| 2  | 26                          | 0                                 | +                                | 68.8               | 72.9                           | 527                      | 394                              | +0.16                            | -5.1                                        | 100                                | 10.2                                       |
| 3  | 33                          | 34                                | -                                | 54.9               | 65.5                           | 205                      | 271                              | +0.32                            | +2.0                                        | 100                                | 5.3                                        |
| 5  | 40                          | 13                                | -                                | 87.3               | 80.3                           | 321                      | 292                              | -0.18                            | -0.7                                        | 70                                 | 5.5                                        |
| 7  | 37                          | 36                                | -                                | 43.4               | 44.6                           | 608                      | 536                              | +0.03                            | -1.9                                        | 100                                | 7.8                                        |
| 8  | 25                          | 0                                 | +                                | 57.7               | 53.1                           | 232                      | 199                              | -0.17                            | -1.3                                        | 15                                 | 2.3                                        |
| 11 | 3                           | 0                                 | +                                | 71.6               | 73.6                           | 401                      | 410                              | -0.67                            | +3.0                                        | 9                                  | 1.5                                        |
| 15 | 37                          | 15                                | -                                | 44.1               | 37.3                           | 390                      | 350                              | -0.18                            | -1.1                                        | 76                                 | 5.5                                        |
| 16 | 15                          | 0                                 | +                                | 66.1               | 60.1                           | 441                      | 466                              | -0.4                             | +1.7                                        | 100                                | 6.0                                        |
| 17 | 31                          | 1                                 | -                                | 71.2               | 64.3                           | 252                      | 234                              | -0.22                            | -0.6                                        | 70                                 | 9.0                                        |
| 19 | 26                          | 0                                 | +                                | 64.1               | 54.4                           | 312                      | 352                              | -0.37                            | +1.5                                        | 61                                 | 7.5                                        |
| 20 | 39                          | 0                                 | +                                | 25.8               | 24.2                           | 213                      | 261                              | -0.04                            | +1.2                                        | 100                                | 7.0                                        |
| 21 | 28                          | 4                                 | -                                | 65.2               | 46.5                           | 367                      | 275                              | -0.67                            | -3.3                                        | 100                                | 7.4                                        |
| 22 | 15                          | 0                                 | +                                | 49.5               | 50.0                           | 310                      | 384                              | +0.03                            | +4.9                                        | 37                                 | 4.5                                        |

Table S2. ERT status, FVC, adherence to NIV, and 6-MWT results in 13 patients with LOPD who started NIV and attended follow-up visit T2. ERT, enzyme replacement therapy, FVC, forced vital capacity, 6-MWT, 6-minutes walk test, NIV, non-invasive ventilation.

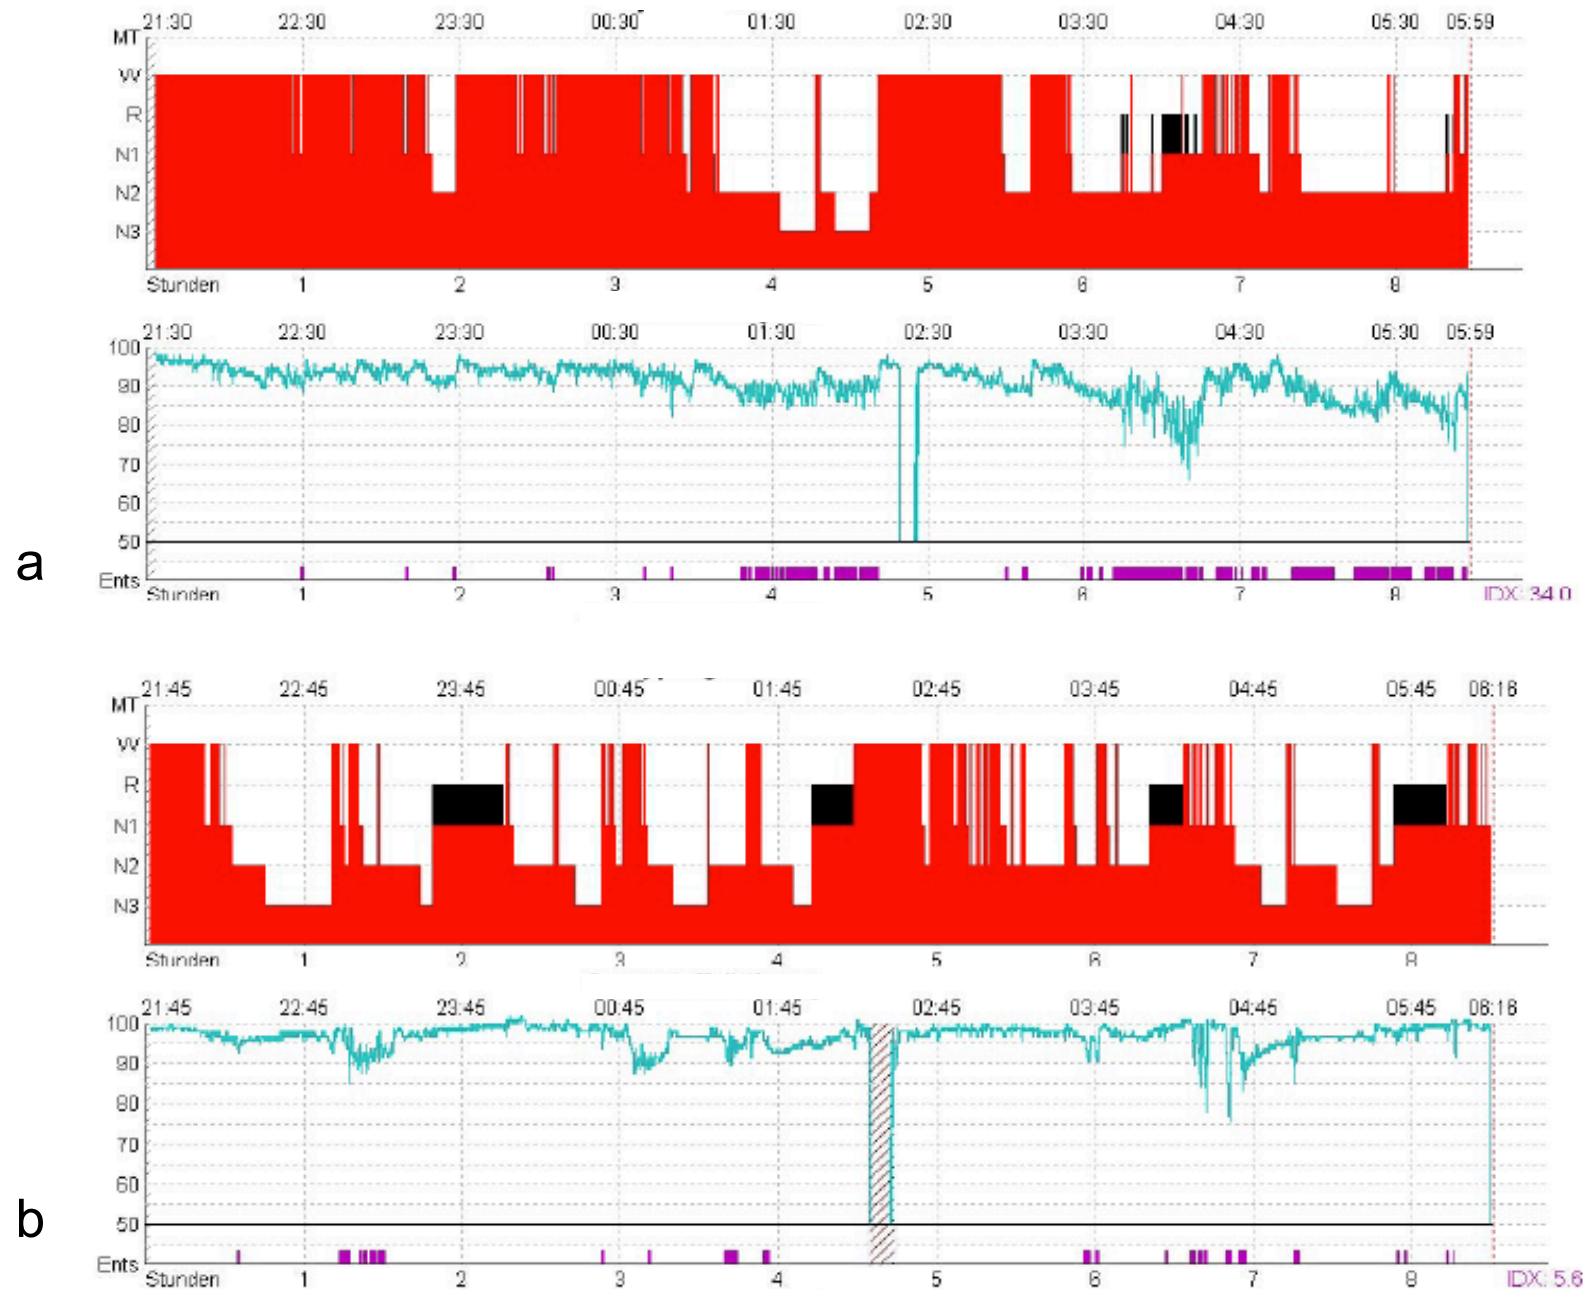

Figure S1. Hypnogram and oxygen saturation before (a) and immediately after (b) initiation of NIV.
